# Supplementary material for: Balanced inhibition underlies tuning and sharpens spike timing in auditory cortex
Source: Springer Nature journal article supplement (doi:10.1038/nature02116), 2003-11-01
Supplement: 41586_2003_BFnature02116_MOESM1_ESM.pdf [file 41586_2003_BFnature02116_MOESM1_ESM.pdf]

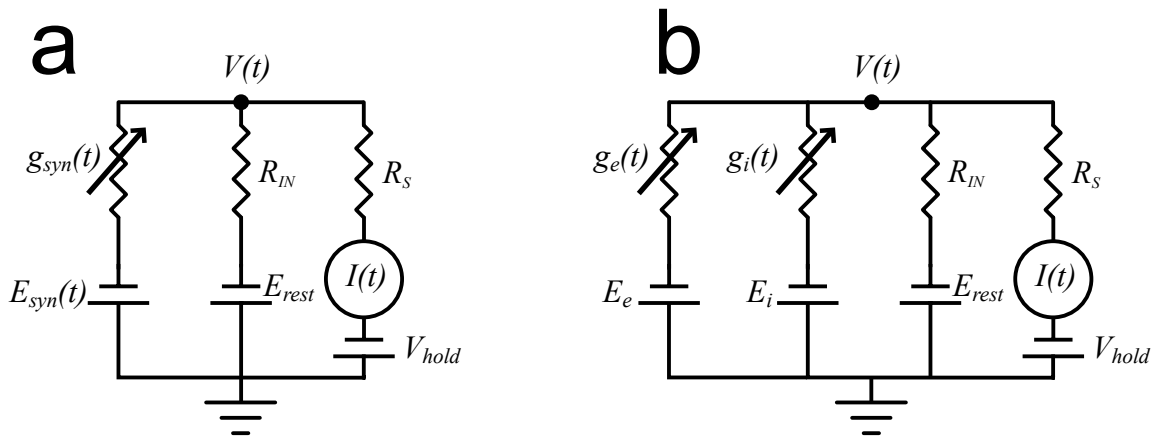

Wehr and Zador Fig S1 Manuscript # 2003-03-02189C
