# Supplementary material for: Balanced inhibition underlies tuning and sharpens spike timing in auditory cortex
Source: Springer Nature journal article supplement (doi:10.1038/nature02116), 2003-11-01

**a**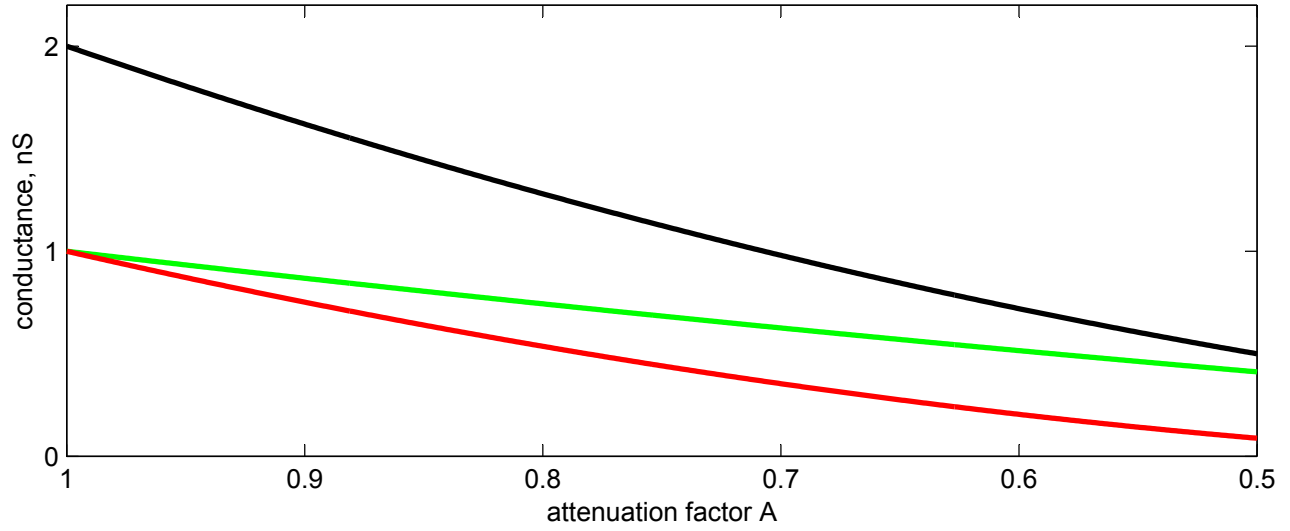**b**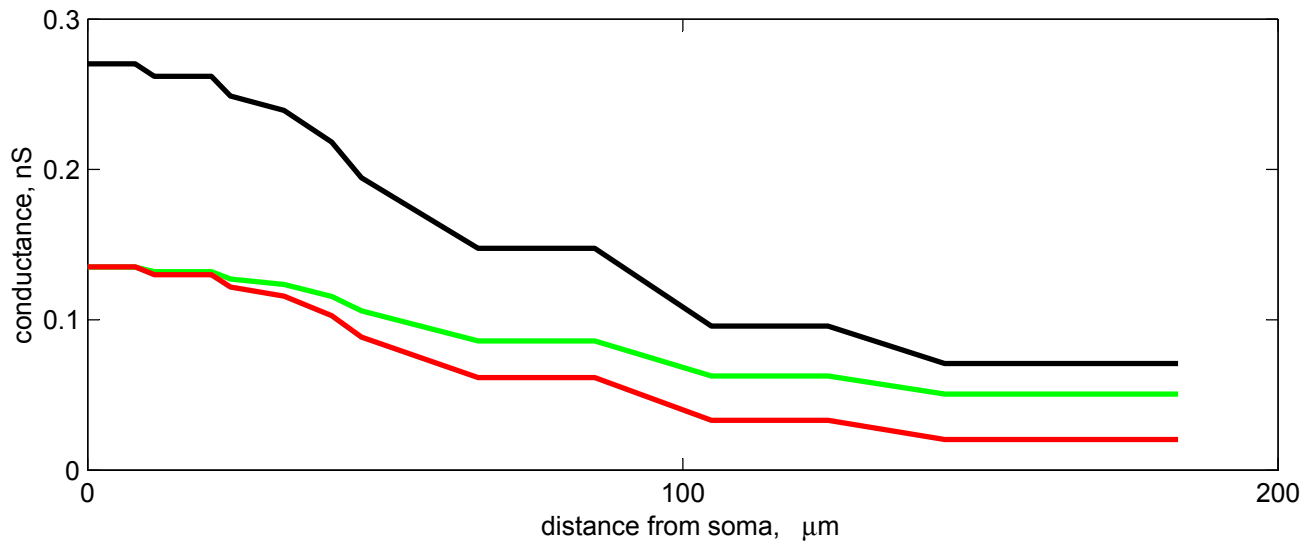**c**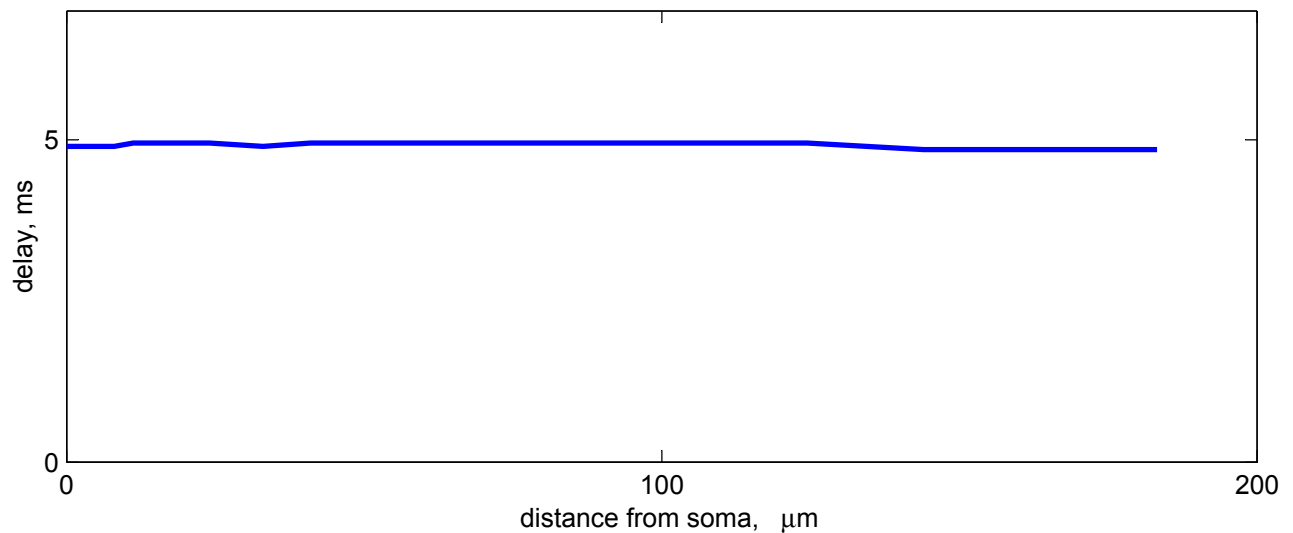

Supplement: 41586_2003_BFnature02116_MOESM2_ESM.pdf [file 41586_2003_BFnature02116_MOESM2_ESM.pdf]
